# Supplementary material for: Phenotypic, transcriptional, physiological and metabolic responses to carbon nanodot exposure inArabidopsis thaliana(L.)
Source: Royal Society of Chemistry journal article supplement (doi:10.1039/c8en00674a), 2018-01-01
Supplement: c8en00674a1.pdf [file c8en00674a1.pdf]

## Supplementary material

# Phenotypic, transcriptional, physiological and metabolic responses to carbon nanodots exposure in *Arabidopsis thaliana* (L.)

Jing Chen<sup>1, 2</sup>, Baofeng Liu<sup>1</sup>, Zhongzhou Yang<sup>1</sup>, Jiao Qu<sup>4</sup>, Hongwei Xun<sup>1</sup>, Runzhi Dou<sup>1</sup>, Xiang Gao<sup>\*1,3</sup>, and Li Wang<sup>\*1</sup>

<sup>1</sup> Key Laboratory of Molecular Epigenetics of MOE, Institute of Genetics and Cytology, Northeast Normal University, Changchun 130024, China

<sup>2</sup> College of Life Science, Jilin Agricultural University, Changchun 130118, Jilin, China.

<sup>3</sup> National Demonstration Center for Experimental Biology Education, Northeast Normal University, Changchun, China

<sup>4</sup> School of Environment, Northeast Normal University, Changchun, China

Correspondence: X. Gao. Tel: +86 0431 85099360. Fax: +86 0431 85693965.

E-mail: gaoxiang424@163.com;

L. Wang. Tel: +86 0431 85099360. Fax: +86 0431 85693965.

E-mail: wanglee57@163.com

## Contents

### Materials and Methods

Characterization and Stability Testing of C-dots  
Transcriptomic Analysis and Quantitative Real-Time PCR Analysis  
H<sub>2</sub>O<sub>2</sub>, Lipid Peroxidation, and Antioxidant Defense System Measurement

### Results

Quantitative Analysis of C-dots in *Arabidopsis*

### Figures

Figure S1. High-resolution TEM image of synthesized C-dots.  
Figure S2. The stability of C-dots in ½ Murashige and Skoog medium.  
Figure S3. The linear equations between C-dots concentration and their absorbance values and the content of C-dots in the *Arabidopsis* roots and shoots.  
Figure S4. Venn diagrams of the genes with more than two fold expression changes and shared among 125 and 1000 mg/L exposure.  
Figure S5. Major gene ontology (GO) process categories of DEGs down/up-regulated (>2.0-fold changes) in *Arabidopsis* seedlings.  
Figure S6. Effects of C-dots on chlorophylls and carotenoids contents in *Arabidopsis* rosette leaves.

### Tables

Table S1. List of primers used for qRT-PCR amplification of selected genes.  
Table S2. The number list of differentially expressed genes that had more than two-fold differences in *Arabidopsis* affected by C-dots.  
Table S3. Gene ontology (GO) process categories of genes up-regulated (>2.0-fold change) in *Arabidopsis* roots.  
Table S4. Gene ontology (GO) process categories of genes up-regulated (>2.0-fold change) in *Arabidopsis* shoots.  
Table S5. Gene ontology (GO) process categories of genes down-regulated (>2.0-fold change) in *Arabidopsis* roots.  
Table S6. Gene ontology (GO) process categories of genes down-regulated (>2.0-fold change) in *Arabidopsis* shoots.  
Table S7. Annotation and relative expression quantity of 54 genes involved in chloroplast part (GO:0044434) in *Arabidopsis* shoots.  
Table S8. Primary metabolites detected in *Arabidopsis* roots exposed to different concentrations of C-dots.  
Table S9. Primary metabolites detected in *Arabidopsis* shoots exposed to different concentrations of C-dots.

## Materials and Methods

### *Characterization and Stability Testing of C-dots*

The morphology and zeta potential of C-dots in ½ Murashige and Skoog (MS) medium without agar (½ MS basal salts, 1% glucose, 0.7% agar, pH 5.8) were estimated separately by a JEOL JEM-2100F highresolution transmission electron microscopy (TEM) (JEOL Ltd, Tokyo, Japan) and a Zeta sizer Nano ZS (Malvern Instruments, UK), respectively. UV-visible absorption spectra of C-dots in ½ MS medium without agar was recorded by a Thermo NanoDrop 1000 spectrophotometer (Nanodrop, Wilmington, DE) before and after autoclaving. In addition, the stability of C-dots in ½ MS medium without agar was monitored for 7 days by a Cary Eclipse Fluorescence spectrometer (Varian Inc., Palo Alto, CA). The fluorescence intensities were excited at 460 nm and measured at 540 nm emission, and fluorescence of C-dots dispersed in DI-water at 0 minutes was set as 100%.

### *Uptake and Translocation Observation of C-dots*

To quantify the content of C-dots absorbed and further transferred by *Arabidopsis* seedlings, 100 mg of fresh rosette leaves exposed to 0-1000 mg/L C-dots were separately ground in 1 mL of DI-H<sub>2</sub>O using a mortar and pestle. Then, the extracts were centrifuged at 10 000 g for 20 min at room temperature. A certain quantity of C-dots was added to the supernatant of the unexposed seedlings to yield concentrations of 62.5, 125, 250, 500, 1000 and 2000 mg/L and then was recorded by the measurement of UV-visible absorbance at 400 nm to obtain standard curves using a Thermo NanoDrop 1000 spectrophotometer (Nanodrop, Wilmington, DE). Then, the supernatants of 62.5, 125, 250, 500 and 1000 mg/L exposed *Arabidopsis* rosette leaves were measured and quantified according to the standard curves under the same conditions.

### *Transcriptomic Analysis and Quantitative Real-Time PCR Analysis*

After 7 days of exposure to C-dots at 0, 125 and 1000 mg/L, the *Arabidopsis* roots and shoots (100 mg) were immediately frozen in liquid nitrogen. Total RNA from the frozen tissues of the control and C-dots exposed *Arabidopsis* seedlings was isolated using an RNAiso Plus (TaKaRa) kit according to the manufacturer's instructions. Contaminating DNA was removed by DNaseI treatment (TaKaRa). The integrity of the extracted RNA was determined using an Agilent 2100 Bioanalyzer (Agilent Technologies, Waldbronn, Germany). Transcriptome libraries of *Arabidopsis* roots and shoots were separately constructed and then were sequenced using a HiSeq 2500 Illumina Genome Analyzer (BGI, Shenzhen, China) with standard protocols. Two biological replicates were conducted for each samples and were sequenced independently.

To validate the results acquired by RNA-seq, eight genes, including two genes

significantly up-regulated and two genes significantly down-regulated in *Arabidopsis* roots, as well as two genes significantly up-regulated and two genes significantly down-regulated in *Arabidopsis* shoots, were selected to confirm their expression levels using quantitative real-time PCR (qRT-PCR). Sequences of 8 selected genes were retrieved from the National Center for Biotechnology Information (NCBI) and subsequently subjected to design gene-specific qRT-PCR primers using Primer Premier software, version 5. To equalize RNA loading into the qRT-PCR, the housekeeping gene ACTIN 2 (*AT3G18780*) was used as an internal reference. The primers employed in this assay were listed in Table S1. The same RNA, used for the transcriptomic analysis experiments, was reverse transcribed into cDNA using M-MLV reverse transcriptase (Promega). qRT-PCR was performed with an ABI StepOne Plus Real-Time PCR System (USA) and SYBR Green PCR Master Mix (TOYOBO). The thermal cycling conditions were 95°C for 60 s, 40 cycles of 95°C for 5 s and 60°C for 60 s, followed by a melting temperature cycle, with constant fluorescence data acquisition from 60 to 95°C.

#### *H<sub>2</sub>O<sub>2</sub>, Lipid Peroxidation, and Antioxidant Defense System Measurement*

The H<sub>2</sub>O<sub>2</sub> suspension were ground in 4 mL of 100mM potassium phosphate buffer (pH 6.8) by mortar and pestle with 500 mg fresh roots and leaves of *Arabidopsis*. Then, the suspension was centrifuged at 10 000g for 20 min, and the supernatant was mixed with 25 mM H<sub>2</sub>SO<sub>4</sub>, 150 μM xylenol orange, and 250 μM ferrous iron in a volume of 2 mL. Finally, with XO/Fe<sup>2+</sup> as blank, the absorbance at 560 nm was measured after incubation above reaction mixture in the dark for 30 min.

Lipid peroxidation was determined by thiobarbituric acid reactive substances (TBARS). Simply, 500 mg fresh roots and leaves of *Arabidopsis* were separately ground in 2 mL 0.1% (w/v) trichloroacetic acid using mortar and pestle. Then, after centrifuged at 10 000g for 20 min, the supernatant (1 mL) was mixed with 1 mL TCA (20%) which contained 0.5% (w/v) thiobarbituric acid (TBA) and 100 μL of butylated hydroxytoluene (BHT, 4% in ethanol). The mixture was further heated at 95°C for 30 min, quickly cooled in an ice bath and centrifuged at 10 000g for 15 min. Finally, using 0.25% TBA in 10% TCA as blank, the absorbance at 532 and 600 nm was measured separately (extinction coefficient 155 mM<sup>-1</sup> cm<sup>-1</sup>).

To assess the effects of C-dots on the activity of antioxidant enzymes, fresh roots and leaves (200 mg) were ground in 4 mL of 100 mM potassium phosphate buffer (pH 6.8). After centrifugation at 10 000 g for 20 min, the supernatant was used for the enzyme activities analysis. The catalase (CAT) activity was determined by monitoring the degradation of H<sub>2</sub>O<sub>2</sub> and one unit of CAT was defined as the amount of enzyme required to degrade 1 μmol of H<sub>2</sub>O<sub>2</sub> per minute at 240 nm (extinction coefficient 39.4 mM<sup>-1</sup> cm<sup>-1</sup>). One unit of the ascorbate peroxidase (APOX) activity was defined as 1 μmol of ascorbate (extinction coefficient 2.8 mM<sup>-1</sup> cm<sup>-1</sup>) oxidized per minute at 290 nm. The guaiacol peroxidase (GPOX) activity was measured through monitoring the formation of guaiacol dehydrogenation product (extinction coefficient 6.39 mM<sup>-1</sup>

cm<sup>-1</sup>) at 420 nm, and one unit of GPOX is defined as 1 μmol of guaiacol oxidized per minute. The superoxide dismutase (SOD) activity was measured by monitoring the inhibition of nitroblue tetrazolium reduction at 560 nm. One unit of SOD activity is the amount of enzyme that decreased the rate of nitroblue tetrazolium reduction by 50%. The glutathione reductase (GR) activity was determined by the decrease in nicotinamide adenine dinucleotide phosphate (NADPH, extinction coefficient 6.2 mM<sup>-1</sup> cm<sup>-1</sup>) at 340 nm, and one unit of GR activity was defined as 1 μmol of NADPH oxidized per minute. The dehydroascorbate reductase (DHAR) activity was estimated by monitoring the formation of ascorbate (extinction coefficient 14 mM<sup>-1</sup> cm<sup>-1</sup>) at 265 nm. One unit of DHAR was equal to 1 μmol of ascorbate formed per minute. All of the enzyme activity assays were performed at 25°C using a Beckman Du-640 Spectrometer (Beckman Coulter, Brea, CA, USA).

## Results

### *The linear equations between C-dots and UV-vis absorbance*

To quantify the content of C-dots absorbed and further transferred by *Arabidopsis* seedlings, different concentrations of C-dots were added to the supernatant of the unexposed seedlings and were recorded by UV-visible absorbance at 400 nm. With the increase of C-dots, the values of UV-visible absorbance rose linearly. Upon multiple linear regression analysis, linear equations were established between C-dot concentrations and the values of UV-visible absorbance in *Arabidopsis* roots and shoots, respectively ( $y=0.0009x+0.0171$ ,  $R^2=1$ ;  $y=0.0009x+0.0136$ ,  $R^2=0.9995$ ) (Fig. S3).

## Figures

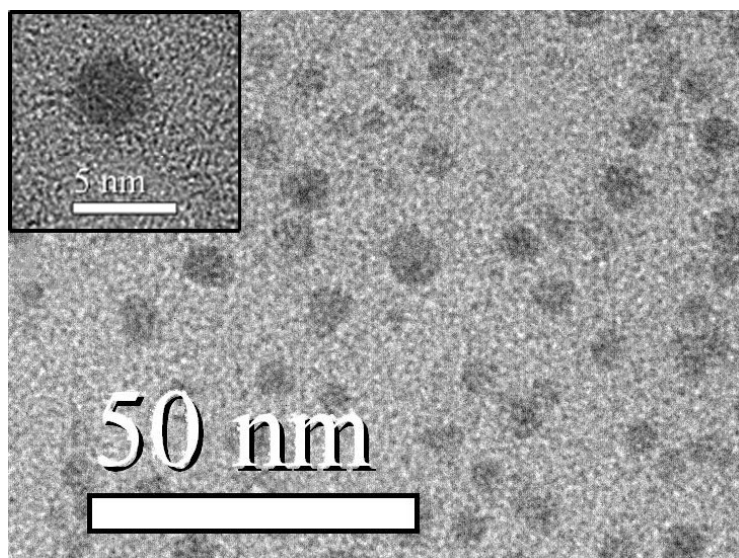

Fig. S1. High-resolution TEM image of synthesized C-dots (inset: a high-resolution TEM image of a single C-dot).

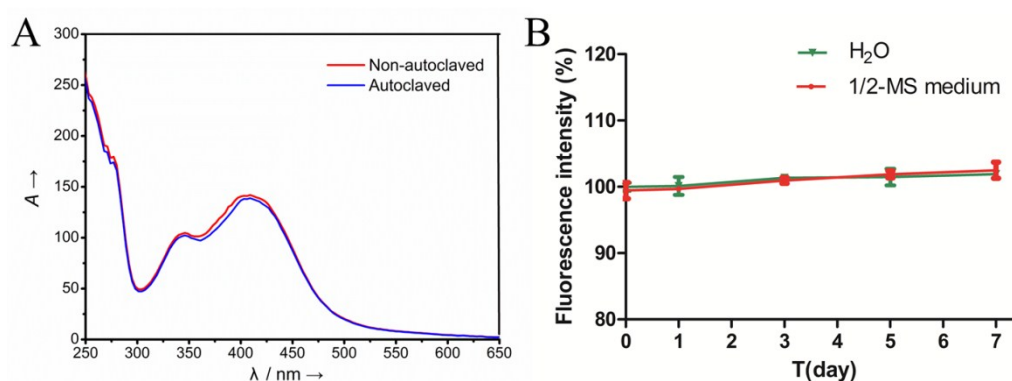

Fig. S2. The stability of 250 mg/L C-dots in  $\frac{1}{2}$  Murashige and Skoog medium. A) UV-visible absorption spectra of C-dots diluted in  $\frac{1}{2}$  Murashige and Skoog medium before and after autoclaving. B) The changes of C-dots fluorescence intensity in  $\frac{1}{2}$  Murashige and Skoog medium and DI-H<sub>2</sub>O. The fluorescence intensities were measured at 540nm emission following excitation at 460 nm, and fluorescence of C-dots dispersed in DI-water at 0 minute was set as 100%. The values were given as mean  $\pm$  SD of triplicate samples.

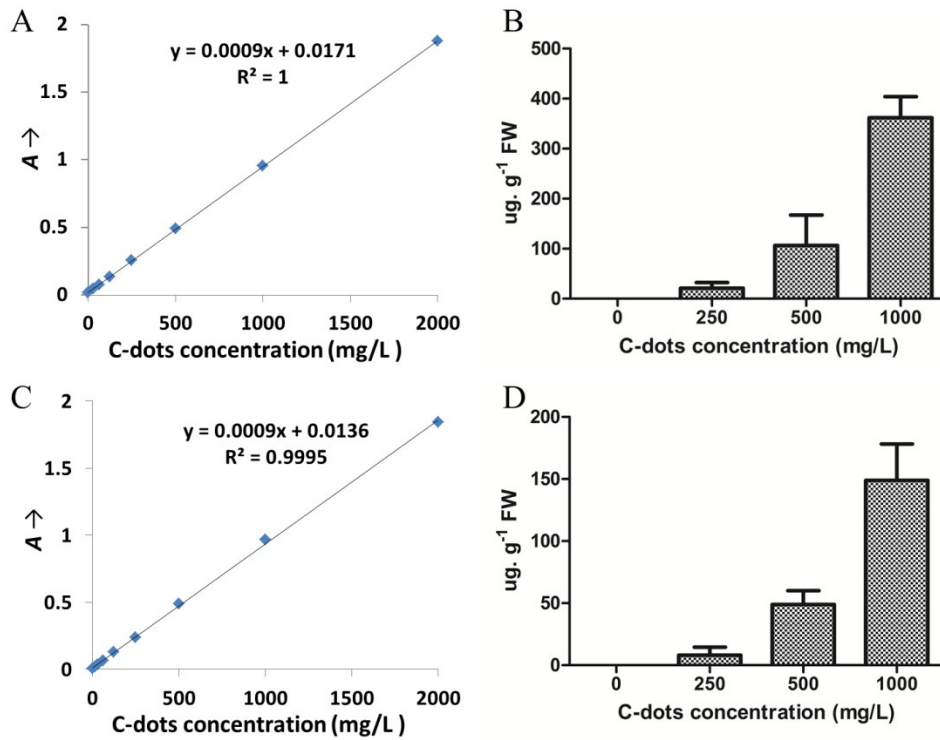

Fig. S3. The linear equations between C-dots concentration and their absorbance values and the content of C-dots in the *Arabidopsis* roots and shoots. A) The linear equations between C-dots concentration and their absorbance values at 400 nm in *Arabidopsis* roots recorded by UV-visible absorbance. B) The content of C-dots in the *Arabidopsis* roots exposed with 0, 250, 500 and 1000 mg/L C-dots, calculated by the left linear equations. C) The linear equations between C-dots concentration and their absorbance values at 400 nm in *Arabidopsis* shoots recorded by UV-visible absorbance. D) The content of C-dots in the *Arabidopsis* shoots exposed with 0, 250, 500 and 1000 mg/L C-dots, calculated by the left linear equations.

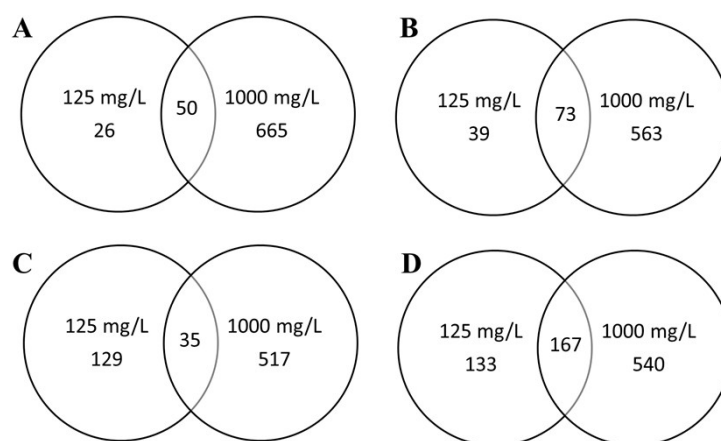

Fig. S4. Venn diagrams of the genes with more than two folds expression changes and shared among 125 and 1000 mg/L exposure. A) Up-regulated genes in *Arabidopsis* roots; B) Up-regulated genes in *Arabidopsis* shoots; C) Down-regulated genes in *Arabidopsis* roots, D) Down-regulated genes in *Arabidopsis* shoots. (A–D) were two

ways comparison, and overlapped areas were shared genes while non-overlapped areas were specific/unique genes for individual treatment.

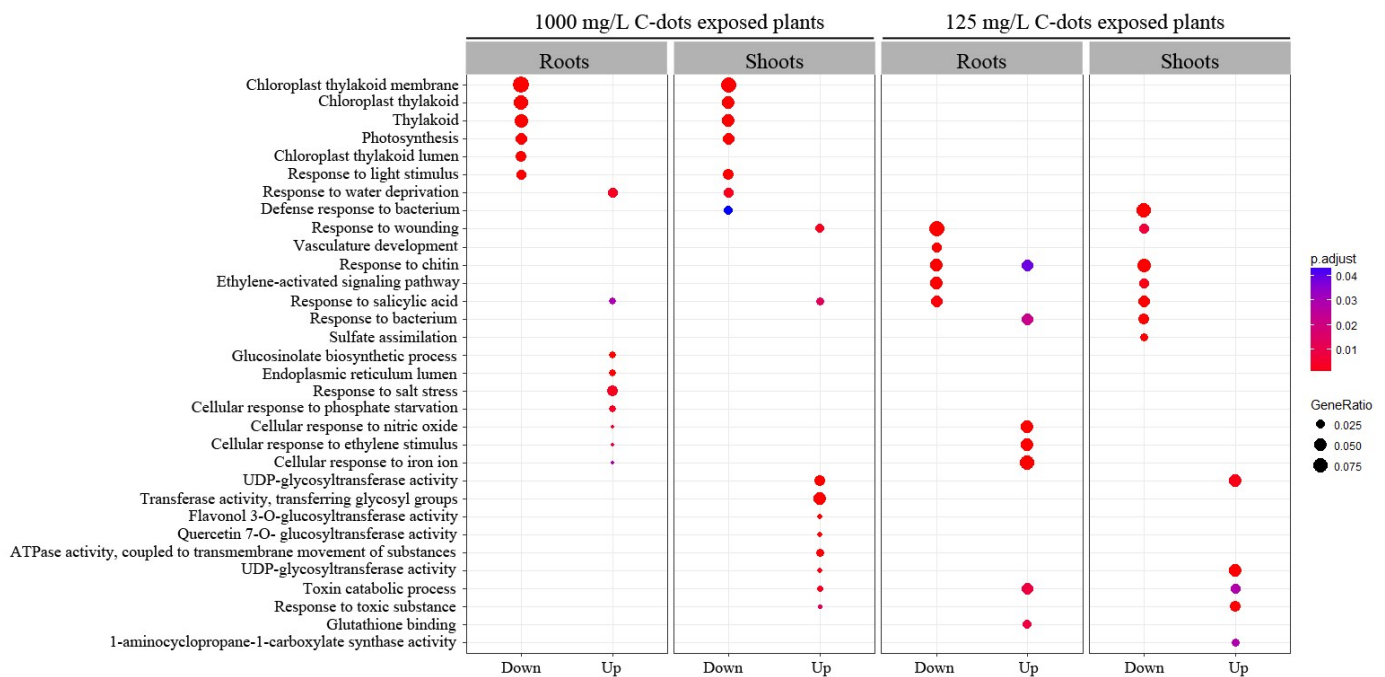

Fig. S5. Major gene ontology (GO) process categories of DEGs down/up-regulated (>2.0-fold changes) in *Arabidopsis* seedlings. The distribution of genes into GO categories was performed using the clusterProfiler package of R to draw. The depth of the color indicates the significance of the enriched pathway. The size of the circle indicates the size of input-genes/reference-genes ratio at different enrichment pathway.



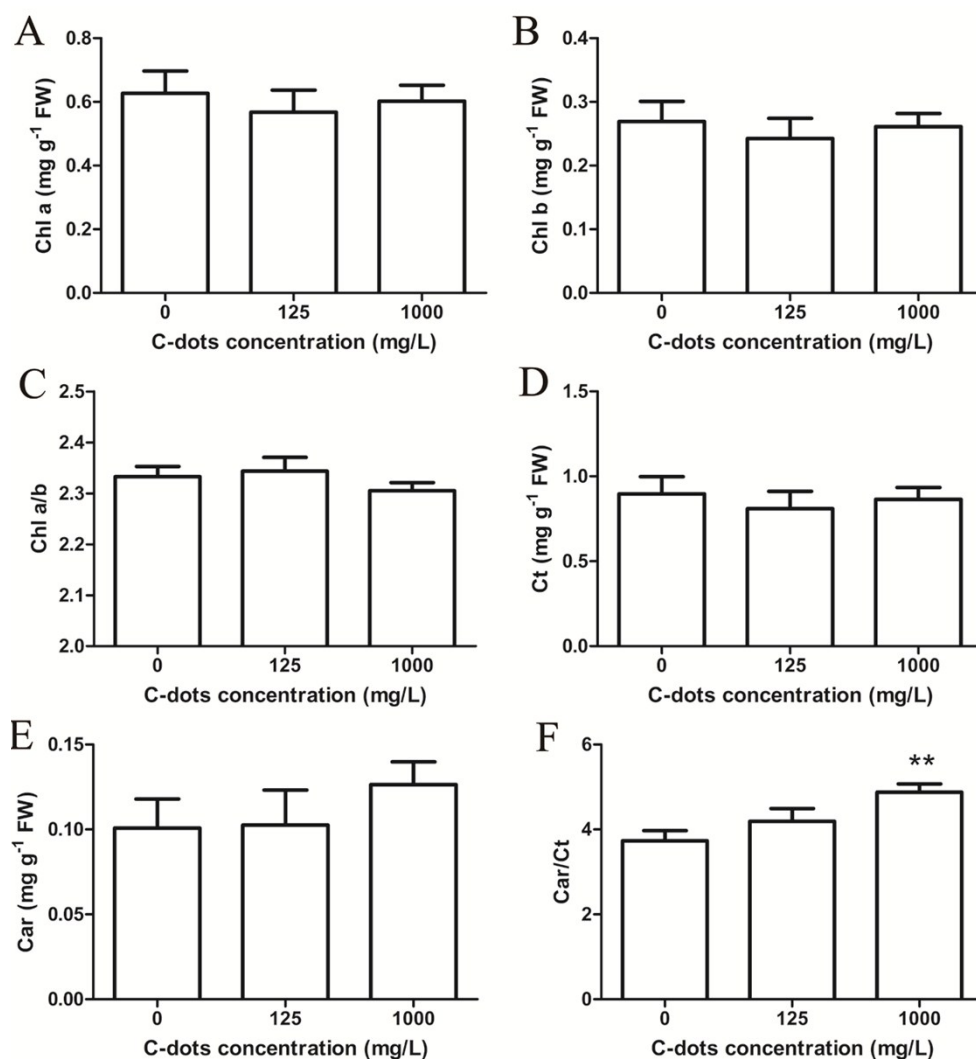

Fig. S6. Effects of C-dots on chlorophylls and carotenoids contents in *Arabidopsis* rosette leaves. A)Chlorophyll a, B)Chlorophyll b, C)Chlorophyll a/b ratio, D)total chlorophylls, E)carotenoids and F)carotenoids/total chlorophylls ratio in rosette leaves of 2-week-old *Arabidopsis* plants treated with 125, 1000mg/L C-dots, and without C-dots for 7 days. The values were given as mean  $\pm$  SD of triplicate samples, and \*\* indicated significance at  $p \leq 0.01$ .

## Tables

**Table S1. List of primers used for qRT-PCR amplification of selected genes.**

| TAIR ID   | Primer Sequence |                              |
|-----------|-----------------|------------------------------|
| AT1G09080 | Forward         | 5'- TAGAAGGCGAAGAGCAGAAAC-3' |
|           | Reverse         | 5'- TGCAACCCAAGATGGTGTAA-3'  |

|           |         |                                |
|-----------|---------|--------------------------------|
| AT1G73120 | Forward | 5'-CAACACTCTCTTCCAGACACTT-3'   |
|           | Reverse | 5'-CTTCATGTGGCACCCAACTA-3'     |
| AT2G34420 | Forward | 5'-TCAACCATGGCTTTGTCTC-3'      |
|           | Reverse | 5'-CAGTCTTCCTCATGGTCACAC-3'    |
| AT3G13840 | Forward | 5'-GTATGCAATGGCCCACTTTG-3'     |
|           | Reverse | 5'-GAAAGGTATGTCTGCGGTTAGA-3'   |
| AT5G14565 | Forward | 5'-AGCGAGACCAATGACGTTAC-3'     |
|           | Reverse | 5'-CTTCATCCTCGTCCGTTTCTT-3'    |
| AT2G47015 | Forward | 5'-AGACAAAGCGGTAATGAGAGAG-3'   |
|           | Reverse | 5'-CAGTGCATGGGTAGAGACAAA-3'    |
| AT5G02810 | Forward | 5'-GAGGCGTCAAATGGGATACA-3'     |
|           | Reverse | 5'-CACAAGAGACCGATACCAGATAAG-3' |
| AT5G63160 | Forward | 5'-GGCGGATCATCGAAGAAAGT-3'     |
|           | Reverse | 5'-TCCGTGACACTCGGAGAATA-3'     |
| At-act II | Forward | 5'-CAACAATTGGGATGACATGGAG-3'   |
|           | Reverse | 5'-GGTGCCTCGGTAAGTAGAATAG-3'   |

**Table S2. The number list of differentially expressed genes that have more than two-fold differences in *Arabidopsis* affected by C-dots.**

| Concentration of C-dots | Tissue | Number of up regulated genes (% a) | Number of down regulated genes (% a) | Number of total affected genes | Percentage of total affected genes in genome |
|-------------------------|--------|------------------------------------|--------------------------------------|--------------------------------|----------------------------------------------|
| 125 mg/L                | Root   | 76 (31.67)                         | 164 (68.33)                          | 240                            | 0.88                                         |
| 125 mg/L                | Shoot  | 112 (27.18)                        | 300 (72.82)                          | 412                            | 1.5                                          |
| 1000 mg/L               | Root   | 715 (56.43)                        | 552 (43.57)                          | 1267                           | 4.62                                         |
| 1000 mg/L               | Shoot  | 636 (47.36)                        | 707 (52.64)                          | 1342                           | 4.9                                          |

**Table S3. Gene ontology (GO) process categories of genes up-regulated (>2.0-fold change) in *Arabidopsis* roots.**

| GO term    | Ontology | Description                        | Number in input list | Number in BG/Ref | p-value  | FDR      |
|------------|----------|------------------------------------|----------------------|------------------|----------|----------|
| GO:0016144 | P        | S-glycoside biosynthetic process   | 10                   | 32               | 2.00E-08 | 9.30E-06 |
| GO:0019758 | P        | glycosinolate biosynthetic process | 10                   | 32               | 2.00E-08 | 9.30E-06 |
| GO:0019761 | P        | glucosinolate biosynthetic process | 10                   | 32               | 2.00E-08 | 9.30E-06 |

|            |   |                                                       |     |      |          |          |
|------------|---|-------------------------------------------------------|-----|------|----------|----------|
| GO:0019760 | P | glucosinolate metabolic process                       | 11  | 47   | 1.10E-07 | 2.50E-05 |
| GO:0016143 | P | S-glycoside metabolic process                         | 11  | 47   | 1.10E-07 | 2.50E-05 |
| GO:0019757 | P | glycosinolate metabolic process                       | 11  | 47   | 1.10E-07 | 2.50E-05 |
| GO:0016138 | P | glycoside biosynthetic process                        | 12  | 59   | 1.60E-07 | 3.10E-05 |
| GO:0016137 | P | glycoside metabolic process                           | 13  | 78   | 5.50E-07 | 9.50E-05 |
| GO:0031669 | P | cellular response to nutrient levels                  | 11  | 58   | 1.10E-06 | 0.00016  |
| GO:0009267 | P | cellular response to starvation                       | 10  | 51   | 2.40E-06 | 0.00033  |
| GO:0031668 | P | cellular response to extracellular stimulus           | 11  | 69   | 6.30E-06 | 0.00071  |
| GO:0071496 | P | cellular response to external stimulus                | 11  | 69   | 6.30E-06 | 0.00071  |
| GO:0042594 | P | response to starvation                                | 10  | 57   | 6.80E-06 | 0.00071  |
| GO:0016036 | P | cellular response to phosphate starvation             | 8   | 35   | 7.20E-06 | 0.00071  |
| GO:0031667 | P | response to nutrient levels                           | 11  | 71   | 8.30E-06 | 0.00077  |
| GO:0006790 | P | sulfur metabolic process                              | 16  | 153  | 1.60E-05 | 0.0014   |
| GO:0042221 | P | response to chemical stimulus                         | 77  | 1548 | 2.70E-05 | 0.0022   |
| GO:0009991 | P | response to extracellular stimulus                    | 11  | 82   | 3.40E-05 | 0.0026   |
| GO:0044272 | P | sulfur compound biosynthetic process                  | 11  | 83   | 3.80E-05 | 0.0027   |
| GO:0006811 | P | ion transport                                         | 23  | 302  | 5.30E-05 | 0.0037   |
| GO:0006950 | P | response to stress                                    | 81  | 1706 | 7.70E-05 | 0.0051   |
| GO:0050896 | P | response to stimulus                                  | 127 | 2998 | 0.00019  | 0.012    |
| GO:0006812 | P | cation transport                                      | 19  | 251  | 0.00024  | 0.014    |
| GO:0019748 | P | secondary metabolic process                           | 24  | 362  | 0.0003   | 0.017    |
| GO:0009607 | P | response to biotic stimulus                           | 29  | 482  | 0.0004   | 0.022    |
| GO:0033554 | P | cellular response to stress                           | 20  | 290  | 0.00056  | 0.029    |
| GO:0000041 | P | transition metal ion transport                        | 7   | 49   | 0.0006   | 0.031    |
| GO:0050801 | P | ion homeostasis                                       | 9   | 81   | 0.00071  | 0.035    |
| GO:0030001 | P | metal ion transport                                   | 14  | 173  | 0.00077  | 0.035    |
| GO:0055066 | P | di-, tri-valent inorganic cation homeostasis          | 7   | 51   | 0.00077  | 0.035    |
| GO:0022857 | F | transmembrane transporter activity                    | 53  | 835  | 6.40E-07 | 0.0004   |
| GO:0022891 | F | substrate-specific transmembrane transporter activity | 44  | 660  | 1.40E-06 | 0.00045  |
| GO:0022892 | F | substrate-specific transporter activity               | 48  | 772  | 3.40E-06 | 0.00059  |
| GO:0005215 | F | transporter activity                                  | 62  | 1098 | 3.80E-06 | 0.00059  |
| GO:0004568 | F | chitinase activity                                    | 6   | 19   | 1.40E-05 | 0.0017   |
| GO:0001871 | F | pattern binding                                       | 5   | 17   | 0.00011  | 0.0084   |
| GO:0030247 | F | polysaccharide binding                                | 5   | 17   | 0.00011  | 0.0084   |
| GO:0015075 | F | ion transmembrane transporter                         | 30  | 462  | 8.90E-05 | 0.0084   |

|            |   |                                                                             |    |      |          |         |
|------------|---|-----------------------------------------------------------------------------|----|------|----------|---------|
|            |   | activity                                                                    |    |      |          |         |
| GO:0016491 | F | oxidoreductase activity                                                     | 55 | 1078 | 0.00016  | 0.011   |
| GO:0008324 | F | cation transmembrane transporter activity                                   | 23 | 341  | 0.00031  | 0.02    |
| GO:0003700 | F | transcription factor activity                                               | 68 | 1469 | 0.00048  | 0.027   |
| GO:0016765 | F | transferase activity, transferring alkyl or aryl (other than methyl) groups | 11 | 115  | 0.00069  | 0.036   |
| GO:0020037 | F | heme binding                                                                | 9  | 83   | 0.00084  | 0.041   |
| GO:0015144 | F | carbohydrate transmembrane transporter activity                             | 10 | 102  | 0.00098  | 0.044   |
| GO:0005788 | C | endoplasmic reticulum lumen                                                 | 5  | 7    | 4.70E-07 | 0.00012 |

**Table S4. Gene ontology (GO) process categories of genes up-regulated (>2.0-fold change) in *Arabidopsis* shoots.**

| GO term    | Ontology | Description                                         | Number in input list | Number in BG/Ref | p-value  | FDR      |
|------------|----------|-----------------------------------------------------|----------------------|------------------|----------|----------|
| GO:0019748 | P        | secondary metabolic process                         | 40                   | 362              | 9.30E-14 | 1.20E-10 |
| GO:0042398 | P        | cellular amino acid derivative biosynthetic process | 20                   | 172              | 4.40E-08 | 2.80E-05 |
| GO:0009698 | P        | phenylpropanoid metabolic process                   | 17                   | 132              | 9.70E-08 | 4.20E-05 |
| GO:0050896 | P        | response to stimulus                                | 132                  | 2998             | 1.50E-07 | 4.70E-05 |
| GO:0006575 | P        | cellular amino acid derivative metabolic process    | 22                   | 223              | 1.90E-07 | 4.80E-05 |
| GO:0009699 | P        | phenylpropanoid biosynthetic process                | 15                   | 111              | 2.80E-07 | 5.10E-05 |
| GO:0006725 | P        | cellular aromatic compound metabolic process        | 25                   | 287              | 3.20E-07 | 5.10E-05 |
| GO:0042221 | P        | response to chemical stimulus                       | 78                   | 1548             | 2.60E-07 | 5.10E-05 |
| GO:0019438 | P        | aromatic compound biosynthetic process              | 18                   | 185              | 2.70E-06 | 0.00034  |
| GO:0009404 | P        | toxin metabolic process                             | 9                    | 46               | 2.90E-06 | 0.00034  |
| GO:0009407 | P        | toxin catabolic process                             | 9                    | 46               | 2.90E-06 | 0.00034  |
| GO:0006869 | P        | lipid transport                                     | 13                   | 105              | 4.60E-06 | 0.00049  |
| GO:0010876 | P        | lipid localization                                  | 13                   | 119              | 1.80E-05 | 0.0018   |
| GO:0044283 | P        | small molecule biosynthetic process                 | 32                   | 541              | 3.40E-05 | 0.0031   |
| GO:0006979 | P        | response to oxidative stress                        | 19                   | 249              | 4.70E-05 | 0.004    |
| GO:0009605 | P        | response to external stimulus                       | 21                   | 295              | 5.30E-05 | 0.0042   |
| GO:0009267 | P        | cellular response to starvation                     | 8                    | 51               | 5.50E-05 | 0.0042   |
| GO:0071555 | P        | cell wall organization                              | 12                   | 118              | 7.60E-05 | 0.0054   |

|            |   |                                                                                                |     |      |          |          |
|------------|---|------------------------------------------------------------------------------------------------|-----|------|----------|----------|
| GO:0031668 | P | cellular response to extracellular stimulus                                                    | 9   | 69   | 8.60E-05 | 0.0055   |
| GO:0071496 | P | cellular response to external stimulus                                                         | 9   | 69   | 8.60E-05 | 0.0055   |
| GO:0042594 | P | response to starvation                                                                         | 8   | 57   | 0.00012  | 0.0076   |
| GO:0031669 | P | cellular response to nutrient levels                                                           | 8   | 58   | 0.00014  | 0.0082   |
| GO:0071554 | P | cell wall organization or biogenesis                                                           | 15  | 191  | 0.0002   | 0.011    |
| GO:0016137 | P | glycoside metabolic process                                                                    | 9   | 78   | 0.00022  | 0.012    |
| GO:0016036 | P | cellular response to phosphate starvation                                                      | 6   | 35   | 0.00029  | 0.015    |
| GO:0009991 | P | response to extracellular stimulus                                                             | 9   | 82   | 0.00033  | 0.016    |
| GO:0009808 | P | lignin metabolic process                                                                       | 6   | 36   | 0.00033  | 0.016    |
| GO:0031667 | P | response to nutrient levels                                                                    | 8   | 71   | 0.00058  | 0.026    |
| GO:0006519 | P | cellular amino acid and derivative metabolic process                                           | 25  | 465  | 0.00086  | 0.038    |
| GO:0008194 | F | UDP-glycosyltransferase activity                                                               | 27  | 183  | 9.00E-13 | 5.00E-10 |
| GO:0035251 | F | UDP-glucosyltransferase activity                                                               | 18  | 80   | 3.30E-12 | 9.30E-10 |
| GO:0046527 | F | glucosyltransferase activity                                                                   | 20  | 117  | 4.70E-11 | 8.60E-09 |
| GO:0016757 | F | transferase activity, transferring glycosyl groups                                             | 36  | 434  | 4.00E-09 | 5.60E-07 |
| GO:0016758 | F | transferase activity, transferring hexosyl groups                                              | 26  | 274  | 3.50E-08 | 3.90E-06 |
| GO:0080044 | F | quercetin 7-O-glucosyltransferase activity                                                     | 7   | 16   | 8.40E-08 | 7.80E-06 |
| GO:0016491 | F | oxidoreductase activity                                                                        | 61  | 1078 | 1.00E-07 | 8.00E-06 |
| GO:0004364 | F | glutathione transferase activity                                                               | 9   | 48   | 4.20E-06 | 0.00029  |
| GO:0016209 | F | antioxidant activity                                                                           | 14  | 124  | 6.00E-06 | 0.00037  |
| GO:0042626 | F | ATPase activity, coupled to transmembrane movement of substances                               | 15  | 148  | 1.10E-05 | 0.00055  |
| GO:0043492 | F | ATPase activity, coupled to movement of substances                                             | 15  | 148  | 1.10E-05 | 0.00055  |
| GO:0016820 | F | hydrolase activity, acting on acid anhydrides, catalyzing transmembrane movement of substances | 15  | 150  | 1.30E-05 | 0.00059  |
| GO:0003824 | F | catalytic activity                                                                             | 248 | 6896 | 2.00E-05 | 0.00087  |
| GO:0022857 | F | transmembrane transporter activity                                                             | 44  | 835  | 2.50E-05 | 0.001    |
| GO:0019825 | F | oxygen binding                                                                                 | 17  | 201  | 3.20E-05 | 0.0012   |
| GO:0016684 | F | oxidoreductase activity, acting on peroxide as acceptor                                        | 11  | 99   | 6.60E-05 | 0.0022   |
| GO:0004601 | F | peroxidase activity                                                                            | 11  | 99   | 6.60E-05 | 0.0022   |
| GO:0022804 | F | active transmembrane transporter activity                                                      | 29  | 491  | 7.60E-05 | 0.0024   |

|            |   |                                                                             |    |      |          |        |
|------------|---|-----------------------------------------------------------------------------|----|------|----------|--------|
| GO:0005215 | F | transporter activity                                                        | 52 | 1098 | 8.20E-05 | 0.0024 |
| GO:0005199 | F | structural constituent of cell wall                                         | 6  | 31   | 0.00014  | 0.0039 |
| GO:0016829 | F | lyase activity                                                              | 20 | 302  | 0.00021  | 0.0055 |
| GO:0080043 | F | quercetin 3-O-glucosyltransferase activity                                  | 5  | 22   | 0.00023  | 0.0059 |
| GO:0015405 | F | P-P-bond-hydrolysis-driven transmembrane transporter activity               | 15 | 195  | 0.00025  | 0.0059 |
| GO:0016765 | F | transferase activity, transferring alkyl or aryl (other than methyl) groups | 11 | 115  | 0.00025  | 0.0059 |
| GO:0015399 | F | primary active transmembrane transporter activity                           | 15 | 196  | 0.00027  | 0.0059 |
| GO:0016840 | F | carbon-nitrogen lyase activity                                              | 5  | 23   | 0.00029  | 0.0062 |
| GO:0016740 | F | transferase activity                                                        | 92 | 2465 | 0.0013   | 0.027  |
| GO:0004553 | F | hydrolase activity, hydrolyzing O-glycosyl compounds                        | 17 | 293  | 0.0024   | 0.048  |

**Table S5. Gene ontology (GO) process categories of genes down-regulated (>2.0-fold change) in *Arabidopsis* roots.**

| GO term    | Ontology | Description                                    | Number in input list | Number in BG/Ref | p-value  | FDR      |
|------------|----------|------------------------------------------------|----------------------|------------------|----------|----------|
| GO:0015979 | P        | photosynthesis                                 | 20                   | 107              | 6.10E-13 | 6.10E-10 |
| GO:0019684 | P        | photosynthesis, light reaction                 | 13                   | 63               | 1.70E-09 | 8.60E-07 |
| GO:0006091 | P        | generation of precursor metabolites and energy | 16                   | 181              | 5.10E-06 | 0.0017   |
| GO:0009765 | P        | photosynthesis, light harvesting               | 5                    | 15               | 1.50E-05 | 0.0038   |
| GO:0009767 | P        | photosynthetic electron transport chain        | 6                    | 27               | 2.70E-05 | 0.0055   |
| GO:0009813 | P        | flavonoid biosynthetic process                 | 7                    | 53               | 0.00019  | 0.033    |
| GO:0022900 | P        | electron transport chain                       | 7                    | 55               | 0.00025  | 0.036    |
| GO:0016168 | F        | chlorophyll binding                            | 7                    | 25               | 1.10E-06 | 0.00035  |
| GO:0046906 | F        | tetrapyrrole binding                           | 11                   | 109              | 4.30E-05 | 0.0071   |
| GO:0019825 | F        | oxygen binding                                 | 15                   | 201              | 7.10E-05 | 0.0079   |
| GO:0015035 | F        | protein disulfide oxidoreductase activity      | 6                    | 41               | 0.00031  | 0.026    |
| GO:0030599 | F        | pectinesterase activity                        | 8                    | 80               | 0.00049  | 0.032    |
| GO:0009579 | C        | thylakoid                                      | 44                   | 301              | 7.60E-22 | 2.10E-19 |
| GO:0034357 | C        | photosynthetic membrane                        | 37                   | 221              | 9.70E-21 | 8.00E-19 |
| GO:0031976 | C        | plastid thylakoid                              | 38                   | 237              | 1.40E-20 | 8.00E-19 |

|            |   |                                |    |      |          |          |
|------------|---|--------------------------------|----|------|----------|----------|
| GO:0044436 | C | thylakoid part                 | 39 | 247  | 8.20E-21 | 8.00E-19 |
| GO:0009534 | C | chloroplast thylakoid          | 38 | 237  | 1.40E-20 | 8.00E-19 |
| GO:0031984 | C | organelle subcompartment       | 38 | 239  | 1.90E-20 | 9.00E-19 |
| GO:0055035 | C | plastid thylakoid membrane     | 32 | 190  | 2.80E-18 | 8.80E-17 |
| GO:0042651 | C | thylakoid membrane             | 33 | 203  | 2.60E-18 | 8.80E-17 |
| GO:0009535 | C | chloroplast thylakoid membrane | 32 | 190  | 2.80E-18 | 8.80E-17 |
| GO:0044434 | C | chloroplast part               | 54 | 604  | 1.60E-16 | 4.60E-15 |
| GO:0044435 | C | plastid part                   | 54 | 658  | 5.60E-15 | 1.40E-13 |
| GO:0031978 | C | plastid thylakoid lumen        | 14 | 70   | 6.30E-10 | 1.40E-08 |
| GO:0009543 | C | chloroplast thylakoid lumen    | 14 | 70   | 6.30E-10 | 1.40E-08 |
| GO:0031977 | C | thylakoid lumen                | 14 | 76   | 2.00E-09 | 4.00E-08 |
| GO:0009521 | C | photosystem                    | 10 | 40   | 1.70E-08 | 3.30E-07 |
| GO:0030076 | C | light-harvesting complex       | 8  | 25   | 5.60E-08 | 9.80E-07 |
| GO:0031090 | C | organelle membrane             | 39 | 633  | 6.20E-08 | 1.00E-06 |
| GO:0009507 | C | chloroplast                    | 92 | 2160 | 8.40E-08 | 1.30E-06 |
| GO:0009536 | C | plastid                        | 92 | 2298 | 1.00E-06 | 1.50E-05 |
| GO:0009523 | C | photosystem II                 | 6  | 25   | 1.70E-05 | 0.00024  |
| GO:0030095 | C | chloroplast photosystem II     | 5  | 18   | 4.10E-05 | 0.00054  |
| GO:0010287 | C | plastoglobule                  | 7  | 57   | 0.00031  | 0.0039   |

**Table S6. Gene ontology (GO) process categories of genes down-regulated (>2.0-fold change) in *Arabidopsis* shoots.**

| GO term    | Ontology | Description                                    | Number in input list | Number in BG/Ref | p-value  | FDR      |
|------------|----------|------------------------------------------------|----------------------|------------------|----------|----------|
| GO:0015979 | P        | photosynthesis                                 | 34                   | 107              | 1.90E-25 | 2.40E-22 |
| GO:0019684 | P        | photosynthesis, light reaction                 | 18                   | 63               | 2.40E-13 | 1.50E-10 |
| GO:0050896 | P        | response to stimulus                           | 163                  | 2998             | 9.90E-12 | 4.10E-09 |
| GO:0009628 | P        | response to abiotic stimulus                   | 75                   | 1060             | 3.30E-11 | 1.00E-08 |
| GO:0009416 | P        | response to light stimulus                     | 42                   | 434              | 5.50E-11 | 1.40E-08 |
| GO:0009266 | P        | response to temperature stimulus               | 36                   | 339              | 9.10E-11 | 1.90E-08 |
| GO:0009314 | P        | response to radiation                          | 42                   | 448              | 1.50E-10 | 2.60E-08 |
| GO:0006950 | P        | response to stress                             | 99                   | 1706             | 2.00E-09 | 3.10E-07 |
| GO:0006952 | P        | defense response                               | 45                   | 577              | 1.10E-08 | 1.50E-06 |
| GO:0006091 | P        | generation of precursor metabolites and energy | 22                   | 181              | 3.00E-08 | 3.70E-06 |
| GO:0009408 | P        | response to heat                               | 18                   | 125              | 3.70E-08 | 4.20E-06 |
| GO:0009639 | P        | response to red or far red light               | 19                   | 155              | 2.20E-07 | 2.30E-05 |
| GO:0009767 | P        | photosynthetic electron                        | 8                    | 27               | 7.80E-07 | 7.50E-05 |

|            |   |                                            |    |      |          |          |
|------------|---|--------------------------------------------|----|------|----------|----------|
|            |   | transport chain                            |    |      |          |          |
| GO:0010218 | P | response to far red light                  | 9  | 41   | 2.60E-06 | 0.00023  |
| GO:0010114 | P | response to red light                      | 10 | 53   | 3.10E-06 | 0.00026  |
| GO:0010200 | P | response to chitin                         | 15 | 127  | 6.10E-06 | 0.00048  |
| GO:0009743 | P | response to carbohydrate stimulus          | 19 | 197  | 8.10E-06 | 0.00059  |
| GO:0042221 | P | response to chemical stimulus              | 78 | 1548 | 1.10E-05 | 0.00079  |
| GO:0009617 | P | response to bacterium                      | 18 | 192  | 2.00E-05 | 0.0013   |
| GO:0022900 | P | electron transport chain                   | 9  | 55   | 3.20E-05 | 0.002    |
| GO:0006955 | P | immune response                            | 21 | 265  | 5.40E-05 | 0.0032   |
| GO:0002376 | P | immune system process                      | 21 | 266  | 5.70E-05 | 0.0032   |
| GO:0048511 | P | rhythmic process                           | 8  | 47   | 6.50E-05 | 0.0034   |
| GO:0007623 | P | circadian rhythm                           | 8  | 47   | 6.50E-05 | 0.0034   |
| GO:0009607 | P | response to biotic stimulus                | 31 | 482  | 6.90E-05 | 0.0034   |
| GO:0055114 | P | oxidation reduction                        | 13 | 126  | 0.0001   | 0.0049   |
| GO:0009409 | P | response to cold                           | 18 | 220  | 0.00012  | 0.0054   |
| GO:0080134 | P | regulation of response to stress           | 9  | 67   | 0.00016  | 0.0067   |
| GO:0009637 | P | response to blue light                     | 8  | 53   | 0.00016  | 0.0067   |
| GO:0031347 | P | regulation of defense response             | 8  | 54   | 0.00018  | 0.0072   |
| GO:0050832 | P | defense response to fungus                 | 10 | 84   | 0.00019  | 0.0072   |
| GO:0010033 | P | response to organic substance              | 51 | 995  | 0.00019  | 0.0072   |
| GO:0045087 | P | innate immune response                     | 19 | 249  | 0.00019  | 0.0072   |
| GO:0009642 | P | response to light intensity                | 9  | 70   | 0.00022  | 0.008    |
| GO:0042742 | P | defense response to bacterium              | 13 | 138  | 0.00025  | 0.009    |
| GO:0009620 | P | response to fungus                         | 12 | 121  | 0.00027  | 0.0092   |
| GO:0050776 | P | regulation of immune response              | 6  | 33   | 0.00037  | 0.012    |
| GO:0002682 | P | regulation of immune system process        | 6  | 33   | 0.00037  | 0.012    |
| GO:0051707 | P | response to other organism                 | 27 | 448  | 0.00051  | 0.016    |
| GO:0009814 | P | defense response, incompatible interaction | 10 | 95   | 0.00052  | 0.016    |
| GO:0006457 | P | protein folding                            | 15 | 209  | 0.0016   | 0.047    |
| GO:0010035 | P | response to inorganic substance            | 18 | 276  | 0.0017   | 0.05     |
| GO:0016168 | F | chlorophyll binding                        | 11 | 25   | 4.70E-11 | 2.00E-08 |
| GO:0046906 | F | tetrapyrrole binding                       | 12 | 109  | 9.90E-05 | 0.021    |
| GO:0009579 | C | thylakoid                                  | 37 | 301  | 6.80E-13 | 2.20E-10 |
| GO:0034357 | C | photosynthetic membrane                    | 31 | 221  | 1.40E-12 | 2.30E-10 |



|            |   |                                |     |      |          |          |
|------------|---|--------------------------------|-----|------|----------|----------|
| GO:0044434 | C | chloroplast part               | 54  | 604  | 3.10E-12 | 3.40E-10 |
| GO:0044435 | C | plastid part                   | 56  | 658  | 8.80E-12 | 7.20E-10 |
| GO:0030076 | C | light-harvesting complex       | 11  | 25   | 4.70E-11 | 3.10E-09 |
| GO:0010287 | C | plastoglobule                  | 15  | 57   | 8.30E-11 | 4.50E-09 |
| GO:0009521 | C | photosystem                    | 12  | 40   | 1.20E-09 | 5.50E-08 |
| GO:0042651 | C | thylakoid membrane             | 24  | 203  | 1.30E-08 | 5.20E-07 |
| GO:0044436 | C | thylakoid part                 | 26  | 247  | 3.70E-08 | 1.30E-06 |
| GO:0009535 | C | chloroplast thylakoid membrane | 22  | 190  | 7.20E-08 | 2.10E-06 |
| GO:0055035 | C | plastid thylakoid membrane     | 22  | 190  | 7.20E-08 | 2.10E-06 |
| GO:0031976 | C | plastid thylakoid              | 24  | 237  | 2.40E-07 | 6.10E-06 |
| GO:0009534 | C | chloroplast thylakoid          | 24  | 237  | 2.40E-07 | 6.10E-06 |
| GO:0031984 | C | organelle subcompartment       | 24  | 239  | 2.80E-07 | 6.60E-06 |
| GO:0009523 | C | photosystem II                 | 8   | 25   | 4.00E-07 | 8.80E-06 |
| GO:0009507 | C | chloroplast                    | 106 | 2160 | 1.60E-06 | 3.30E-05 |
| GO:0009536 | C | plastid                        | 107 | 2298 | 1.20E-05 | 0.00024  |
| GO:0009570 | C | chloroplast stroma             | 18  | 210  | 6.50E-05 | 0.0012   |
| GO:0009532 | C | plastid stroma                 | 19  | 240  | 0.00012  | 0.0021   |
| GO:0030095 | C | chloroplast photosystem II     | 5   | 18   | 0.00014  | 0.0023   |
| GO:0044425 | C | membrane part                  | 50  | 1004 | 0.00041  | 0.0063   |
| GO:0005576 | C | extracellular region           | 16  | 205  | 0.00046  | 0.0068   |
| GO:0031978 | C | plastid thylakoid lumen        | 8   | 70   | 0.0011   | 0.015    |
| GO:0009543 | C | chloroplast thylakoid lumen    | 8   | 70   | 0.0011   | 0.015    |
| GO:0031977 | C | thylakoid lumen                | 8   | 76   | 0.0018   | 0.024    |
| GO:0010319 | C | stromule                       | 5   | 32   | 0.0023   | 0.029    |

**Table S7. Annotation and relative expression quantity of 54 genes involved in chloroplast part (GO:0044434) in *Arabidopsis* shoots.**

| Gene ID          | Annotation                                                                        | Relative Expression Quantity |             |             |             | logFC        | P-value     |
|------------------|-----------------------------------------------------------------------------------|------------------------------|-------------|-------------|-------------|--------------|-------------|
|                  |                                                                                   | CK-1                         | CK-2        | 1000-1      | 1000-1      |              |             |
|                  | oxidoreductases, acting on NADH or NADPH, quinone or similar compound as acceptor |                              |             |             |             |              |             |
| <i>AT5G58260</i> | or NADPH, quinone or similar compound as acceptor                                 | 54.60119922                  | 67.93502867 | 33.40551322 | 26.39392387 | -1.212288388 | 0.002226225 |
| <i>AT2G01870</i> | transmembrane protein                                                             | 9.420120937                  | 10.09434899 | 5.412383688 | 5.26106626  | -1.059961511 | 1.03E-05    |
| <i>AT4G02770</i> | photosystem I subunit D-1                                                         | 1251.168596                  | 1499.191709 | 662.5260661 | 637.4508568 | -1.26361074  | 2.97E-08    |
| <i>AT4G27700</i> | Rhodanese/Cell cycle control phosphatase superfamily protein                      | 57.00527682                  | 66.47631546 | 31.65021261 | 29.35276519 | -1.201380689 | 4.84E-21    |
| <i>AT1G14150</i> | PsbQ-like 2                                                                       | 73.53527629                  | 77.86145358 | 36.30596252 | 29.60696242 | -1.38754352  | 1.23E-12    |
| <i>AT1G06680</i> | photosystem II subunit P-1                                                        | 1412.202488                  | 1733.395306 | 893.5057199 | 878.204031  | -1.009561485 | 2.71E-07    |
| <i>AT5G51720</i> | 2 iron, 2 sulfur cluster binding protein                                          | 46.21028127                  | 52.00079245 | 12.88335527 | 11.48151964 | -2.197436785 | 3.09E-30    |
| <i>AT4G12800</i> | photosystem I subunit I                                                           | 1337.337127                  | 1714.347263 | 783.9850025 | 798.0208204 | -1.127176996 | 0.002974107 |

|                  |                                                                            |             |             |             |             |              |             |
|------------------|----------------------------------------------------------------------------|-------------|-------------|-------------|-------------|--------------|-------------|
| <i>AT1G52230</i> | photosystem I subunit H2                                                   | 349.5755857 | 450.7568692 | 159.0546148 | 156.9162092 | -1.519315324 | 2.45E-11    |
| <i>AT4G19170</i> | nine-cis-epoxycarotenoid<br>dioxygenase 4                                  | 15.35570694 | 19.74217666 | 7.349569823 | 8.789241644 | -1.301709254 | 3.36E-17    |
| <i>AT2G05100</i> | photosystem II light harvesting<br>complex protein 2.1                     | 121.5231506 | 157.1194092 | 31.24450796 | 29.20359781 | -2.382114772 | 4.13E-07    |
| <i>AT2G34420</i> | photosystem II light harvesting<br>complex protein B1B2                    | 5614.999775 | 5370.671637 | 2251.182301 | 2471.163723 | -1.416049112 | 1.33E-05    |
| <i>AT1G23740</i> | Oxidoreductase, zinc-binding<br>dehydrogenase family protein               | 25.81028186 | 28.16685506 | 15.6827241  | 13.349558   | -1.081070467 | 0.000105018 |
| <i>AT2G26500</i> | cytochrome b6f complex subunit<br>(petM)                                   | 506.6154109 | 885.1489462 | 309.2699164 | 276.2713573 | -1.408329311 | 0.00410608  |
| <i>AT1G15980</i> | NDH-dependent cyclic electron<br>flow 1                                    | 77.17469085 | 85.01534409 | 39.45910454 | 32.28989663 | -1.361865777 | 9.02E-12    |
| <i>AT5G38420</i> | Ribulose biphosphate carboxylase<br>(small chain) family protein           | 3844.432718 | 4173.087017 | 2300.337033 | 1943.100704 | -1.104286084 | 1.24E-06    |
| <i>AT1G20020</i> | ferredoxin-NADP[+]-<br>oxidoreductase 2                                    | 419.1373375 | 465.7756298 | 196.7875919 | 187.5859008 | -1.389858332 | 0.000207911 |
| <i>AT5G53490</i> | Tetratricopeptide repeat (TPR)-like<br>superfamily protein                 | 77.3408258  | 129.4993557 | 56.14408456 | 57.85449748 | -1.023476667 | 6.46E-07    |
| <i>AT1G32080</i> | membrane protein                                                           | 54.54498282 | 66.30639747 | 31.02129187 | 28.06444279 | -1.213279099 | 5.07E-16    |
| <i>AT1G54780</i> | thylakoid lumen 18.3 kDa protein                                           | 131.0302354 | 156.7722372 | 82.26780848 | 79.79978195 | -1.011180553 | 0.00040162  |
| <i>AT5G62720</i> | Integral membrane HPP family<br>protein                                    | 119.9165968 | 144.1945745 | 38.46299572 | 61.00294353 | -1.598511295 | 3.34E-13    |
| <i>AT3G15840</i> | post-illumination chlorophyll<br>fluorescence increase<br>subunit NDH-M of | 97.86837382 | 118.0720566 | 52.86159885 | 54.64992793 | -1.189312415 | 5.72E-06    |
| <i>AT4G37925</i> | NAD(P)H:plastoquinone<br>dehydrogenase complex                             | 66.84700087 | 75.20943362 | 37.36011194 | 34.8039563  | -1.163173029 | 4.66E-16    |
| <i>AT4G09650</i> | F-type H <sup>+</sup> -transporting ATPase<br>subunit delta                | 370.2421012 | 433.0357571 | 239.855942  | 211.0778127 | -1.015548745 | 1.16E-06    |
| <i>AT2G04030</i> | Chaperone protein htpG family<br>protein                                   | 101.6285791 | 120.2537604 | 65.49250311 | 57.30860981 | -1.035313951 | 4.97E-11    |
| <i>AT5G07020</i> | proline-rich family protein                                                | 102.8769888 | 122.3082729 | 65.49593587 | 61.94781202 | -1.004084805 | 4.00E-12    |
| <i>AT3G54890</i> | chlorophyll a-b binding protein 6                                          | 1339.693687 | 1261.780617 | 679.6239451 | 589.7999736 | -1.230422791 | 1.47E-07    |
| <i>AT1G67740</i> | photosystem II BY                                                          | 885.2034278 | 1014.748368 | 478.9596858 | 463.1492093 | -1.197196713 | 2.01E-07    |
| <i>AT1G14345</i> | NAD(P)-linked oxidoreductase<br>superfamily protein                        | 67.98684912 | 77.71635399 | 36.67480403 | 30.7692248  | -1.294690825 | 7.74E-08    |
| <i>AT1G15820</i> | light harvesting complex<br>photosystem II subunit 6                       | 518.5386335 | 619.5977769 | 286.5568149 | 298.2168894 | -1.144582386 | 7.27E-06    |
| <i>AT5G21430</i> | Chaperone DnaJ-domain<br>superfamily protein                               | 61.28051691 | 63.96186267 | 36.71658699 | 33.66902622 | -1.021559971 | 2.46E-09    |
| <i>AT4G17090</i> | chloroplast beta-amylase                                                   | 49.29345859 | 65.24538413 | 16.211112   | 19.79806243 | -1.849486548 | 4.37E-11    |
| <i>AT1G80380</i> | P-loop containing nucleoside<br>triphosphate hydrolases superfamily        | 121.0110015 | 102.6086051 | 63.5042566  | 60.77573695 | -1.050453002 | 0.002051589 |

|           |                                                                             |             |             |             |             |              |             |
|-----------|-----------------------------------------------------------------------------|-------------|-------------|-------------|-------------|--------------|-------------|
|           | protein                                                                     |             |             |             |             |              |             |
| AT3G28220 | TRAF-like family protein                                                    | 1.701618016 | 1.322324073 | 0.669160505 | 0.546368894 | -1.52166538  | 5.93E-05    |
| AT3G01440 | PsbQ-like 1                                                                 | 26.56192311 | 33.9728914  | 12.57077969 | 9.380462052 | -1.638667826 | 1.79E-06    |
| AT3G47470 | light-harvesting chlorophyll-protein complex I subunit A4                   | 1117.569286 | 1229.120232 | 628.031272  | 646.1375776 | -1.069712003 | 1.76E-07    |
| AT2G34430 | light-harvesting chlorophyll-protein complex II subunit B1                  | 2153.710174 | 1867.048128 | 746.3290508 | 682.2268931 | -1.693901685 | 2.73E-11    |
| AT5G66190 | ferredoxin-NADP[+]-oxidoreductase 1                                         | 357.0372088 | 381.3346162 | 191.6308951 | 187.5953066 | -1.150920226 | 5.69E-13    |
| AT2G05070 | photosystem II light harvesting complex protein 2.2                         | 118.3024132 | 159.7819897 | 37.88342353 | 33.92039855 | -2.127618957 | 8.89E-06    |
| AT3G48420 | Haloacid dehalogenase-like hydrolase (HAD) superfamily protein              | 54.35113327 | 58.72947431 | 26.0968898  | 24.53062265 | -1.347662154 | 5.76E-05    |
| AT3G50820 | photosystem II subunit O-2                                                  | 475.7644344 | 564.4041495 | 299.2893485 | 290.5293518 | -1.001687807 | 5.67E-06    |
| AT3G16250 | NDH-dependent cyclic electron flow 1                                        | 56.59377766 | 69.3587478  | 28.95640005 | 24.3769338  | -1.419458775 | 4.99E-15    |
| AT3G62410 | CP12 domain-containing protein 2                                            | 292.0221084 | 349.6578165 | 122.7531804 | 110.7203773 | -1.640205994 | 2.81E-16    |
| AT1G20340 | Cupredoxin superfamily protein                                              | 2024.588399 | 2024.180401 | 1188.347947 | 1104.241    | -1.013266538 | 0.000375279 |
| AT4G04020 | fibrillin                                                                   | 29.1876242  | 38.47893665 | 16.12524662 | 14.08400868 | -1.339557078 | 6.21E-17    |
| AT1G51110 | Plastid-lipid associated protein PAP / fibrillin family protein             | 26.67054664 | 28.39566756 | 11.58840751 | 11.96541417 | -1.415709056 | 7.03E-20    |
| AT1G61520 | PSI type III chlorophyll a/b-binding protein                                | 1314.673057 | 1511.517822 | 764.4211945 | 766.0695276 | -1.070441905 | 4.66E-06    |
| AT5G02940 | ion channel POLLUX-like protein, putative                                   | 14.70755609 | 17.54219959 | 6.961075763 | 7.593393245 | -1.332289194 | 1.34E-13    |
| AT3G54050 | high cyclic electron flow 1 thylakoid lumenal protein                       | 216.6625859 | 240.0070917 | 129.916241  | 125.6426038 | -1.024773727 | 6.66E-13    |
| AT1G77090 | (Mog1/PsbP/DUF1795-like photosystem II reaction center PsbP family protein) | 24.72780729 | 24.55827415 | 13.57496169 | 11.51899504 | -1.165966276 | 5.40E-06    |
| AT1G55480 | protein containing PDZ domain, a K-box domain, and a TPR region             | 52.28236903 | 60.96242927 | 32.380986   | 29.5336477  | -1.054465174 | 8.49E-06    |
| AT3G13470 | TCP-1/cpn60 chaperonin family protein                                       | 80.12207414 | 96.60347885 | 54.15564246 | 45.68956617 | -1.003975048 | 1.35E-09    |
| AT1G60950 | 2Fe-2S ferredoxin-like superfamily protein                                  | 1590.235855 | 1732.829928 | 923.0044946 | 836.0748109 | -1.104920462 | 2.46E-11    |
| AT3G47070 | thylakoid soluble phosphoprotein                                            | 147.1026899 | 178.2231943 | 85.94994935 | 82.41808176 | -1.132074436 | 9.91E-07    |

**Table S8. Primary metabolites detected in *Arabidopsis* roots exposed to different concentrations of C-dots**

| Metabolites                | Retention Time | 0 mg/L C-dots                   | 125 mg/L C-dots                  | 1000 mg/L C-dots                |
|----------------------------|----------------|---------------------------------|----------------------------------|---------------------------------|
| <b>Amino Acid</b>          |                |                                 |                                  |                                 |
| L-Proline                  | 14.869         | 8917980±7888490 <sup>ab</sup>   | 7634440±7149610 <sup>b</sup>     | 18252000±5827090 <sup>a</sup>   |
| L-Tyrosine                 | 21.83          | 4488610±391034 <sup>ab</sup>    | 4708580±494764 <sup>a</sup>      | 3853480±745613 <sup>b</sup>     |
| Pidolic Acid               | 14.998         | 2648050±327861 <sup>a</sup>     | 2553040±507896 <sup>a</sup>      | 3379330±2521950 <sup>a</sup>    |
| 4-Oxoproline               | 15.625         | 1696680±813330 <sup>a</sup>     | 1966310±523564 <sup>a</sup>      | 1859180±782115 <sup>a</sup>     |
| <b>Organic Acid</b>        |                |                                 |                                  |                                 |
| Pentanedioic acid          | 14.555         | 5278860±1324510 <sup>a</sup>    | 3821480±843460 <sup>a</sup>      | 4139850±1120300 <sup>a</sup>    |
| 3-Methyladipic acid        | 21.089         | 4742270±950723 <sup>a</sup>     | 3459910±975399 <sup>b</sup>      | 2208360±404149 <sup>c</sup>     |
| Gluconic acid              | 17.734         | 4109770±374274 <sup>a</sup>     | 3924260±606438 <sup>a</sup>      | 4246690±934486 <sup>a</sup>     |
| Carbamic acid              | 12.186         | 3782040±1413150 <sup>a</sup>    | 4477670±654099 <sup>a</sup>      | 5009650±776936 <sup>a</sup>     |
| 2-Ketoadipic acid          | 19.821         | 3526840±727478 <sup>a</sup>     | 3738880±550093 <sup>a</sup>      | 3673220±564604 <sup>a</sup>     |
| Salicylic acid             | 9.244          | 3105810±440563 <sup>a</sup>     | 3253590±901468 <sup>a</sup>      | 3161560±876693 <sup>a</sup>     |
| Malic acid                 | 13.249         | 2713820±862439 <sup>a</sup>     | 2682470±493778 <sup>a</sup>      | 4184490±1456180 <sup>a</sup>    |
| Dehydrodesmosterol acetate | 21.051         | 2070870±73337.9 <sup>b</sup>    | 2678980±164080 <sup>a</sup>      | 2336500±389001 <sup>ab</sup>    |
| Benzoic acid               | 15.067         | 1914210±576951 <sup>a</sup>     | 0±0 <sup>b</sup>                 | 0±0 <sup>b</sup>                |
| Ethanedioic acid           | 8.808          | 1348280±335286 <sup>a</sup>     | 1657540±487734 <sup>a</sup>      | 2219160±1060910 <sup>a</sup>    |
| <b>Fatty Acid</b>          |                |                                 |                                  |                                 |
| Hexadecanoic acid          | 19.546         | 174184000±11874000 <sup>a</sup> | 183501000±12844000 <sup>a</sup>  | 174331000±15002800 <sup>a</sup> |
| Octadecanoic acid          | 21.357         | 93879400±42182700 <sup>b</sup>  | 131048000±10393000 <sup>ab</sup> | 135580000±9538600 <sup>a</sup>  |
| Tetradecanoic acid         | 17.543         | 8809310±693741 <sup>a</sup>     | 8783360±1118930 <sup>a</sup>     | 8430680±736743 <sup>a</sup>     |
| Octadecenoic acid          | 21.257         | 3430240±305408 <sup>a</sup>     | 2941110±477093 <sup>b</sup>      | 2014680±470205 <sup>b</sup>     |
| <b>Sugar</b>               |                |                                 |                                  |                                 |
| Glucose-1-phosphate        | 38.551         | 571050000±43405000 <sup>a</sup> | 561255000±36392100 <sup>a</sup>  | 544070000±82150500 <sup>a</sup> |
| Melezitose                 | 23.007         | 253489000±51492800 <sup>a</sup> | 288576000±23831400 <sup>a</sup>  | 436419000±53415300 <sup>a</sup> |
| d-Glucose oxime            | 16.84          | 97517000±30151200 <sup>a</sup>  | 60961100±21459300 <sup>b</sup>   | 42245800±14463000 <sup>b</sup>  |
| d-Galactose oxime          | 16.565         | 90845600±32889200 <sup>a</sup>  | 69937700±23120300 <sup>ab</sup>  | 47984300±14400400 <sup>b</sup>  |
| Ribulose-5-phosphate       | 23.068         | 20557700±2855050 <sup>b</sup>   | 31867100±4406140 <sup>a</sup>    | 32883300±2352110 <sup>a</sup>   |
| Gulose                     | 17.811         | 19785500±3225670 <sup>a</sup>   | 24142200±10306100 <sup>a</sup>   | 21052300±6715860 <sup>a</sup>   |
| Maltose                    | 23.183         | 9285400±1929160 <sup>a</sup>    | 9263610±1137840 <sup>a</sup>     | 9490900±815465 <sup>a</sup>     |
| d-Glucopyranoside          | 28.769         | 7489710±3511420 <sup>a</sup>    | 5881800±1400750 <sup>ab</sup>    | 3411900±1035500 <sup>b</sup>    |
| d-Xylofuranose             | 23.695         | 6044390±936774 <sup>a</sup>     | 5628210±800785 <sup>a</sup>      | 5948660±847641 <sup>a</sup>     |
| d-Turanose                 | 28.387         | 5742240±1989260 <sup>b</sup>    | 6728100±1073790 <sup>b</sup>     | 17371100±5306700 <sup>a</sup>   |
| d-Glucopyranose            | 25.644         | 5380620±2493740 <sup>a</sup>    | 6729970±456424 <sup>a</sup>      | 4979090±965178 <sup>a</sup>     |
| d-Glucose                  | 16.978         | 4194590±1453870 <sup>a</sup>    | 3687680±390307 <sup>a</sup>      | 5087440±1546350 <sup>a</sup>    |
| Talose                     | 17.857         | 4189250±1401370 <sup>b</sup>    | 5030250±386624 <sup>b</sup>      | 8088450±1777320 <sup>a</sup>    |
| Hexopyranose               | 24.612         | 2749370±232389 <sup>a</sup>     | 2809760±290225 <sup>a</sup>      | 2499160±261691 <sup>a</sup>     |
| 5-Ketofructose             | 15.908         | 2544340±736701 <sup>a</sup>     | 2113130±446122 <sup>a</sup>      | 2868010±685310 <sup>a</sup>     |
| Galactinol                 | 27.753         | 2436050±616350 <sup>a</sup>     | 1438700±187873 <sup>b</sup>      | 1814400±526283 <sup>ab</sup>    |
| Levoglucofan               | 16.061         | 1671180±243759 <sup>ab</sup>    | 2156830±583449 <sup>a</sup>      | 1278420±271156 <sup>b</sup>     |

| <b>Others</b>    |        |                               |                                |                               |
|------------------|--------|-------------------------------|--------------------------------|-------------------------------|
| Glycerol         | 9.657  | 24934900±3808720 <sup>a</sup> | 26673400±4153800 <sup>a</sup>  | 31327500±5727870 <sup>a</sup> |
| Inositol         | 18.415 | 21654900±3052190 <sup>b</sup> | 28604400±4549870 <sup>a</sup>  | 34189000±5723950 <sup>a</sup> |
| d-Mannitol       | 17.054 | 21413300±6594100 <sup>a</sup> | 15820200±4809590 <sup>a</sup>  | 13659500±4324200 <sup>a</sup> |
| 1,3-Dipalmitin   | 37.565 | 16182100±6846370 <sup>a</sup> | 23484500±10579700 <sup>a</sup> | 22632400±5477840 <sup>a</sup> |
| Phloretin        | 22.274 | 10140000±4132470 <sup>a</sup> | 10950400±2117650 <sup>a</sup>  | 14335900±1829020 <sup>a</sup> |
| Phosphoric acid  | 10.673 | 9730340±7492450 <sup>a</sup>  | 11254900±6543870 <sup>a</sup>  | 13276400±2325310 <sup>a</sup> |
| 2-Monostearin    | 25.239 | 9280790±1690980 <sup>a</sup>  | 10535100±2477790 <sup>a</sup>  | 11837200±4643900 <sup>a</sup> |
| Arabitol         | 14.655 | 7698750±2231800 <sup>a</sup>  | 6950320±1838880 <sup>a</sup>   | 6667770±1478000 <sup>a</sup>  |
| 2-Monopalmitin   | 23.779 | 7575330±956010 <sup>b</sup>   | 8967850±667779 <sup>a</sup>    | 9329930±567109 <sup>a</sup>   |
| Anhydrohexitol   | 16.137 | 4304480±756264 <sup>a</sup>   | 4421780±383063 <sup>a</sup>    | 3567110±721329 <sup>a</sup>   |
| Monomyristin     | 22.495 | 3131720±588573 <sup>a</sup>   | 3423340±512162 <sup>a</sup>    | 3297480±451331 <sup>a</sup>   |
| Monolaurin       | 20.883 | 2407120±658991 <sup>a</sup>   | 2583020±818727 <sup>a</sup>    | 1760470±355351 <sup>a</sup>   |
| Phosphoglyceride | 16.481 | 1948330±324088 <sup>a</sup>   | 1765480±415246 <sup>a</sup>    | 1783800±267004 <sup>a</sup>   |

The values were given as mean ± SD of six samples. Different letters represent significant differences between the treatment means ( $p < 0.05$ , LSD).

**Table S9. Primary metabolites detected in *Arabidopsis* shoots exposed to different concentrations of C-dots**

| <b>Metabolites</b>            | <b>Retention Time</b> | <b>0 mg/L C-dots</b>            | <b>125 mg/L C-dots</b>          | <b>1000 mg/L C-dots</b>         |
|-------------------------------|-----------------------|---------------------------------|---------------------------------|---------------------------------|
| <b>Amino Acid</b>             |                       |                                 |                                 |                                 |
| L-Proline                     | 14.861                | 98427400±11763200 <sup>a</sup>  | 116835000±29729800 <sup>a</sup> | 121860000±25694600 <sup>a</sup> |
| L-Valine                      | 8.029                 | 26694100±6082850 <sup>b</sup>   | 47478300±5985000 <sup>a</sup>   | 46317600±12428400 <sup>a</sup>  |
| Serine                        | 10.497                | 9658090±2932030 <sup>a</sup>    | 11600700±3566060 <sup>a</sup>   | 10102300±3410650 <sup>a</sup>   |
| L-Ornithine                   | 11.422                | 5995430±2200600 <sup>a</sup>    | 4786070±1542260 <sup>a</sup>    | 7387530±3387840 <sup>a</sup>    |
| L-Aspartic acid               | 13.111                | 5141080±910296 <sup>a</sup>     | 5622660±1065840 <sup>a</sup>    | 4774060±1449440 <sup>a</sup>    |
| L-Threonine                   | 10.879                | 2737370±987722 <sup>a</sup>     | 3944190±574927 <sup>a</sup>     | 3686810±1547520 <sup>a</sup>    |
| L-Homoserine                  | 11.124                | 2405270±1288520 <sup>b</sup>    | 5084180±2354930 <sup>a</sup>    | 6658100±1474380 <sup>a</sup>    |
| Glycine                       | 6.806                 | 1796280±550435 <sup>b</sup>     | 3144080±520259 <sup>a</sup>     | 2796130±899896 <sup>a</sup>     |
| <b>Organic Acid</b>           |                       |                                 |                                 |                                 |
| Octadecanoic acid             | 21.341                | 305842000±28502100 <sup>a</sup> | 320903000±29953800 <sup>a</sup> | 304929000±15987000 <sup>a</sup> |
| D-Galactopyranosiduronic acid | 22.083                | 13229000±12924300 <sup>a</sup>  | 3755850±493650 <sup>a</sup>     | 4504700±2271850 <sup>a</sup>    |
| 2-hydroxyl-Butanedioic acid   | 13.226                | 12443700±3032060 <sup>a</sup>   | 10459100±1271480 <sup>a</sup>   | 6678190±2110500 <sup>b</sup>    |
| Ethanedioic acid              | 8.806                 | 10864800±1119620 <sup>b</sup>   | 16675200±4302670 <sup>a</sup>   | 15954900±2351490 <sup>a</sup>   |
| 2-Ketoadipic acid             | 19.782                | 9071710±1151210 <sup>b</sup>    | 11312000±1465980 <sup>a</sup>   | 12092300±1384960 <sup>a</sup>   |
| Propanedioic acid             | 18.193                | 8275120±1996710 <sup>a</sup>    | 9882470±3662200 <sup>a</sup>    | 6409150±2171390 <sup>a</sup>    |
| Glycerol phosphate            | 16.45                 | 5948790±1043070 <sup>a</sup>    | 5801580±1203150 <sup>a</sup>    | 5974270±2076800 <sup>a</sup>    |

|                               |        |                                 |                                 |                                 |
|-------------------------------|--------|---------------------------------|---------------------------------|---------------------------------|
| Fumaric acid                  | 11.567 | 5363250±1886990 <sup>a</sup>    | 4439720±1062450 <sup>a</sup>    | 1920850±777291 <sup>b</sup>     |
| L-Threonic acid               | 13.623 | 5223840±2528460 <sup>a</sup>    | 3251120±1007930 <sup>ab</sup>   | 2736300±724693 <sup>b</sup>     |
| Hexacosanoic acid             | 27.975 | 5189590±980359 <sup>b</sup>     | 7657570±1090750 <sup>a</sup>    | 6653040±2021120 <sup>ab</sup>   |
| Fumaric acid                  | 24.115 | 4686750±1066270 <sup>a</sup>    | 4847570±843257 <sup>a</sup>     | 4964640±1032820 <sup>a</sup>    |
| 2-Pentenedioic acid           | 16.328 | 4650460±570869 <sup>a</sup>     | 5066100±1253840 <sup>a</sup>    | 3782210±800988 <sup>a</sup>     |
| Dodecanoic acid               | 15.358 | 4340590±804674 <sup>a</sup>     | 4401310±793453 <sup>a</sup>     | 4323010±728653 <sup>a</sup>     |
| 2,2-Dihydroxyacetic acid      | 12.179 | 3957130±756821 <sup>a</sup>     | 3601790±969620 <sup>a</sup>     | 3825550±1374500 <sup>a</sup>    |
| Hexanedioic acid              | 13.972 | 3873910±1482440 <sup>a</sup>    | 4377680±672514 <sup>a</sup>     | 3129700±1542500 <sup>a</sup>    |
| Pentadecanoic acid            | 18.521 | 3590110±1246150 <sup>a</sup>    | 3214530±850666 <sup>a</sup>     | 3977110±1669020 <sup>a</sup>    |
| Terephthalic acid             | 22.319 | 3559320±953546 <sup>b</sup>     | 4616660±826994 <sup>ab</sup>    | 5653140±1335800 <sup>a</sup>    |
| Hexenoic acid                 | 10.434 | 3276070±1175260 <sup>a</sup>    | 3959370±3066310 <sup>a</sup>    | 4992720±1138500 <sup>a</sup>    |
| Octacosanoic acid, synthetic  | 31.054 | 3086680±431992 <sup>b</sup>     | 3390930±226643 <sup>a</sup>     | 3733200±264232 <sup>a</sup>     |
| Butyric acid                  | 7.196  | 2659300±843639 <sup>b</sup>     | 2787520±1214960 <sup>b</sup>    | 5738700±3274210 <sup>a</sup>    |
| Tetradecanoic acid            | 17.513 | 25782600±3145570 <sup>a</sup>   | 25241800±3630380 <sup>a</sup>   | 24640000±3223000 <sup>a</sup>   |
| 10,12-Docosadienedioic acid   | 28.158 | 2426950±902310 <sup>a</sup>     | 2614610±174020 <sup>a</sup>     | 2684460±1136510 <sup>a</sup>    |
| Carboxylic acid               | 11.506 | 2153330±263655 <sup>b</sup>     | 3907640±774940 <sup>a</sup>     | 4307900±1166370 <sup>a</sup>    |
| Eicosanoic acid               | 27.287 | 1241520±394254 <sup>a</sup>     | 1348880±235959 <sup>a</sup>     | 1505770±269500 <sup>a</sup>     |
| <b>Fatty Acid</b>             |        |                                 |                                 |                                 |
| Hexadecanoic acid             | 19.523 | 332728000±40646800 <sup>a</sup> | 347045000±34648900 <sup>a</sup> | 336020000±22333500 <sup>a</sup> |
| Myristic acid                 | 22.793 | 8187100±1915060 <sup>a</sup>    | 8658270±1114600 <sup>a</sup>    | 9636520±1258850 <sup>a</sup>    |
| Oleic acid                    | 21.242 | 7100630±947194 <sup>a</sup>     | 28211500±48871600 <sup>a</sup>  | 9698190±1749780 <sup>a</sup>    |
| Sebacic acid                  | 21.074 | 5929840±1393700 <sup>a</sup>    | 4674440±1008470 <sup>a</sup>    | 0±0 <sup>b</sup>                |
| Octadecanoic acid             | 20.745 | 4475550±1126960 <sup>a</sup>    | 5748700±757632 <sup>a</sup>     | 5231280±899158 <sup>a</sup>     |
| Cis-10-Heptadecenoic acid     | 27.592 | 2720010±614203 <sup>b</sup>     | 3768170±716816 <sup>a</sup>     | 3470880±202378 <sup>ab</sup>    |
| 9,12,15-Octadecatrienoic acid | 33.996 | 2218880±315699 <sup>b</sup>     | 2763730±270787 <sup>a</sup>     | 2855770±470034 <sup>a</sup>     |
| <b>Sugar</b>                  |        |                                 |                                 |                                 |
| D-Glucopyranoside             | 22.961 | 114186000±20157700 <sup>b</sup> | 171842000±29103900 <sup>a</sup> | 192980000±46164700 <sup>a</sup> |
| D-Ribose                      | 16.55  | 48965700±18449900 <sup>a</sup>  | 39540000±16154700 <sup>a</sup>  | 26807900±14214100 <sup>a</sup>  |
| Gulose                        | 17.795 | 34176900±9872880 <sup>a</sup>   | 46155300±16204600 <sup>a</sup>  | 42845900±14666500 <sup>a</sup>  |
| Glucose                       | 16.825 | 31603900±14330300 <sup>a</sup>  | 22990000±7321030 <sup>a</sup>   | 26704500±24612500 <sup>a</sup>  |
| D-Fructose                    | 16.687 | 31136200±7888570 <sup>a</sup>   | 26404600±10549000 <sup>a</sup>  | 19147400±10390400 <sup>a</sup>  |
| Mannose                       | 25.59  | 12775500±3209830 <sup>a</sup>   | 15231100±2345820 <sup>a</sup>   | 15324800±1946890 <sup>a</sup>   |
| D-Erythro pentose             | 19.721 | 12583100±2079550 <sup>a</sup>   | 13580900±1417380 <sup>a</sup>   | 12873700±2758960 <sup>a</sup>   |
| D-Turanose                    | 25.086 | 10609100±1945210 <sup>a</sup>   | 13515600±879849 <sup>a</sup>    | 11053700±2127070 <sup>a</sup>   |
| N-Acetyl glucosamine          |        |                                 |                                 |                                 |
| methoxime                     | 18.078 | 9868990±2679890 <sup>a</sup>    | 12075600±2701470 <sup>a</sup>   | 7629430±3319820 <sup>a</sup>    |
| Maltose                       | 19.163 | 9737210±2817150 <sup>a</sup>    | 8202220±1477250 <sup>a</sup>    | 8455030±2039980 <sup>a</sup>    |
| Mannofuranose                 | 23.657 | 9250990±1550760 <sup>a</sup>    | 11312900±1560310 <sup>a</sup>   | 10887000±1480350 <sup>a</sup>   |
| D-Xylofuranose                | 16.122 | 8937180±2451240 <sup>a</sup>    | 8905690±968645 <sup>a</sup>     | 8749180±1551320 <sup>a</sup>    |
| Glycoside                     | 23.519 | 5885070±792295 <sup>a</sup>     | 7966970±397229 <sup>a</sup>     | 5648100±1065330 <sup>a</sup>    |
| Melibiose                     | 19.859 | 5618890±1639440 <sup>b</sup>    | 8752240±2060860 <sup>ab</sup>   | 10036700±2544790 <sup>a</sup>   |

|                               |        |                                 |                                 |                                 |
|-------------------------------|--------|---------------------------------|---------------------------------|---------------------------------|
| DL-Arabinopyranose            | 18.139 | 4089580±241499 <sup>a</sup>     | 2996300±559574 <sup>b</sup>     | 3113770±500527 <sup>b</sup>     |
| Melezitose                    | 30.053 | 3328160±1020790 <sup>a</sup>    | 4100590±631156 <sup>a</sup>     | 3447240±740773 <sup>a</sup>     |
| Hexopyranose                  | 19.094 | 2353070±417841 <sup>b</sup>     | 2652570±420171 <sup>b</sup>     | 3922900±913545 <sup>a</sup>     |
| <b>Others</b>                 |        |                                 |                                 |                                 |
| Myo-Inositol                  | 18.392 | 15826400±6330370 <sup>a</sup>   | 18777700±4500090 <sup>a</sup>   | 19396600±4282220 <sup>a</sup>   |
| Benzofuran                    | 16.932 | 14826600±2043560 <sup>a</sup>   | 17325000±3579060 <sup>a</sup>   | 16656700±2978280 <sup>a</sup>   |
| Xylitol                       | 14.647 | 11507800±2551180 <sup>a</sup>   | 11127700±2572640 <sup>a</sup>   | 11001500±1926310 <sup>a</sup>   |
| Glucitol                      | 17.008 | 10882800±3718280 <sup>a</sup>   | 10485900±3106320 <sup>a</sup>   | 9510100±5841280 <sup>a</sup>    |
| 1-Monopalmitoylglycerol       | 24.024 | 161632000±21140200 <sup>a</sup> | 173287000±12612000 <sup>a</sup> | 185296000±29306000 <sup>a</sup> |
| 1-Glycerol stearate           | 25.483 | 97887500±13751000 <sup>a</sup>  | 103308000±6982640 <sup>a</sup>  | 110401000±18352800 <sup>a</sup> |
| Phosphoric acid               | 10.643 | 95020900±22826500 <sup>a</sup>  | 76535700±9000740 <sup>ab</sup>  | 57093300±12942700 <sup>b</sup>  |
| Glycerol                      | 9.664  | 85103600±22742000 <sup>a</sup>  | 86108400±22533300 <sup>a</sup>  | 71243800±10044900 <sup>a</sup>  |
| 3,4-Octadecanetriol           | 15.847 | 16136100±3423360 <sup>a</sup>   | 15993500±2843860 <sup>a</sup>   | 15465100±4601200 <sup>a</sup>   |
| 2-Monopalmitin                | 23.741 | 13923300±1117560 <sup>b</sup>   | 17439800±1732370 <sup>a</sup>   | 18460700±1888080 <sup>a</sup>   |
| 1,4-Butanediamine             | 15.098 | 6561720±736956 <sup>a</sup>     | 6533860±900172 <sup>a</sup>     | 6354280±715217 <sup>a</sup>     |
| Gulonic acid-lactone          | 16.045 | 6190290±2068680 <sup>a</sup>    | 8882730±890440 <sup>a</sup>     | 7989220±3326200 <sup>a</sup>    |
| 1,4-Benzenediol               | 14.425 | 4596690±532964 <sup>a</sup>     | 4162990±455045 <sup>a</sup>     | 4324310±766528 <sup>a</sup>     |
| 2,6-Di-tert-butylbenzoquinone | 14.257 | 3371450±302040 <sup>a</sup>     | 3400080±778529 <sup>a</sup>     | 3486580±602244 <sup>a</sup>     |
| Methyl -heptadecanoate        | 20.783 | 1546270±362835 <sup>b</sup>     | 2215490±331830 <sup>ab</sup>    | 2997140±1266640 <sup>a</sup>    |

The values were given as mean ± SD of six samples. Different letters represent significant differences between the treatment means ( $p < 0.05$ , LSD).
